# Supplementary material for: Machine learning for patient risk stratification: standing on, or looking over, the shoulders of clinicians?
Source: PubMed Central journal article supplement (PMC8010071; doi:10.1038/s41746-021-00426-3), 2021-03-30
Supplement: 41746_2021_426_MOESM1_ESM.pdf [file 41746_2021_426_MOESM1_ESM.pdf]

**Supplementary Materials**

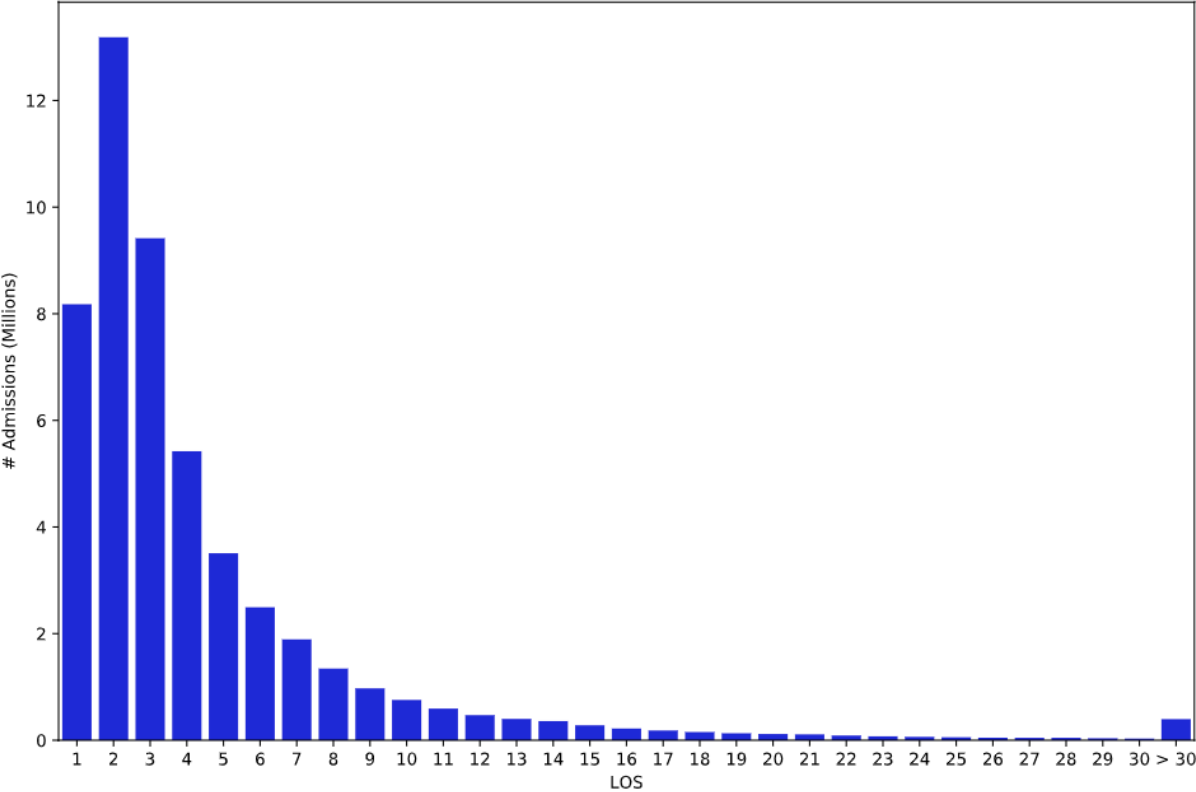

**Supplementary Figure 1.** Histogram of length of stays for included admissions (in millions).

**Supplementary Table 1.** Example first day charges for an MI patient with little data available.

| <b>Description</b>                                 | <b>Department</b> | <b>Quantity</b> |
|----------------------------------------------------|-------------------|-----------------|
| PF ER LEVEL V                                      | PROFESSIONAL FEES | 1               |
| EKG ROUTINE TRACING ONLY                           | EKG               | 2               |
| ER LEVEL V                                         | EMERGENCY ROOM    | 1               |
| THERAPEUTIC/DIAG INJ IV PUSH SINGLE INITI SUB/DRUG | IV THERAPY        | 1               |
| *LORAZEPAM, ATIVAN INJ 2MG                         | PHARMACY          | 1               |
| R&B ONCOLOGY PRIVATE                               | ROOM AND BOARD    | 1               |

**Supplementary Table 2.** Example first day charges with unclear treatment actions.

| Description                                           | Department          | Quantity |
|-------------------------------------------------------|---------------------|----------|
| PF ER LEVEL V                                         | PROFESSIONAL FEES   | 1        |
| EKG ROUTINE TRACING ONLY                              | EKG                 | 2        |
| PRESSURIZED OR NONPRESSURIZED INHALATION TX           | RESPIRATORY THERAPY | 1        |
| ER LEVEL V                                            | EMERGENCY ROOM      | 1        |
| CPAP PER DAY                                          | RESPIRATORY THERAPY | 1        |
| CPAP PER DAY                                          | RESPIRATORY THERAPY | 1        |
| RT TIME FLAT RATE                                     | RESPIRATORY THERAPY | 1        |
| *XR CHEST 1 VIEW PORTABLE                             | DIAGNOSTIC IMAGING  | 1        |
| CULTURE BLOOD                                         | LABORATORY          | 2        |
| PARTIAL THROMBOPLASTIN TIME (PTT)                     | LABORATORY          | 1        |
| PROTHROMBIN TIME (PT)                                 | LABORATORY          | 1        |
| COMPLETE CBC AUTO W/AUTO DIFF                         | LABORATORY          | 1        |
| TROPONIN QN                                           | LABORATORY          | 1        |
| LACTATE/LACTIC ACID                                   | LABORATORY          | 1        |
| GLUCOSE BY DEVICE                                     | LABORATORY          | 1        |
| CREATINE KINASE (CPK) MB ONLY                         | LABORATORY          | 1        |
| CREATINE KINASE (CPK)                                 | LABORATORY          | 1        |
| COMPREHENSIVE METABOLIC PANEL 80053                   | LABORATORY          | 1        |
| NEW THERA PROPHY/DIAG INJ EA ADD SEQ PUSH<br>SUB/DRUG | IV THERAPY          | 2        |
| IV INFUSION SUBSTANCES/DRUG CONCURRENT 96368          | IV THERAPY          | 1        |
| IV INFUSION SUBST/DRUG EA ADD SEQ UP TO 1 HR 96367    | IV THERAPY          | 1        |
| IV INFUSION SUBSTANCES/DRUGS EACH ADDL 1 HR 96366     | IV THERAPY          | 3        |
| IV INFUSION SUBSTANCES/DRUGS UP TO 1 HR 96365         | IV THERAPY          | 1        |
| 0.9% NAACL VL 10ML                                    | PHARMACY            | 1        |
| 0.9% NAACL 250ML                                      | PHARMACY            | 1        |
| ASPIRIN TAB CHW 81MG (EA)                             | PHARMACY            | 4        |
| ALBUTEROL, NONCOMP INH SOL 1MG                        | PHARMACY            | 5        |

|                                                    |                     |      |
|----------------------------------------------------|---------------------|------|
| INSULIN ASPART PROT/ASPART, NOVOLOG 70/30 PER DOSE | PHARMACY            | 0.05 |
| IPRATROPIUM/ALBUTEROL, DUONEB INH SOL 3ML          | PHARMACY            | 1    |
| LIDOCAINE, XYLOCAINE VL 2% 10ML                    | PHARMACY            | 1    |
| HEPARIN NA VL 1,000U/ML 1ML                        | PHARMACY            | 1    |
| HEPARIN NA VL 1,000U/ML 1ML                        | PHARMACY            | 1    |
| *FUROSEMIDE, LASIX VL 40MG 4ML                     | PHARMACY            | 3    |
| FENTANYL, SUBLIMAZE AMP 0.05MG/ML 2ML              | PHARMACY            | 1    |
| CEFTRIAZONE, ROCEPHIN VL 250MG                     | PHARMACY            | 1    |
| AZITHROMYCIN, ZITHROMAX VL 500MG                   | PHARMACY            | 1    |
| NON REVENUE ITEM                                   | ADMINISTRATIVE FEES | 5    |
| R&B ICU                                            | ROOM AND BOARD      | 1    |

**Supplementary Table 3.** Admitting Physician Specialty (where available).

| Admitting Physician Specialty          | # Admissions |
|----------------------------------------|--------------|
| INTERNAL MEDICINE (IM)                 | 8,683,840    |
| HOSPITALIST (HOS)                      | 7,668,355    |
| OBSTETRICS/GYNECOLOGY (OBG)            | 4,295,512    |
| UNKNOWN                                | 3,254,355    |
| PEDIATRICS (PD)                        | 3,209,914    |
| FAMILY PRACTICE (FP)                   | 2,286,362    |
| ORTHOPEDIC SURGERY (ORS)               | 1,824,100    |
| PSYCHIATRY (P)                         | 1,765,802    |
| GENERAL SURGERY (GS)                   | 1,479,856    |
| NEONATAL - PERINATAL MEDICINE (NPM)    | 892,949      |
| CARDIOVASCULAR DISEASES (CD)           | 876,613      |
| UNSPECIFIED (US)                       | 672,255      |
| NEUROLOGICAL SURGERY (NS)              | 433,030      |
| PULMONARY DISEASES (PUD)               | 426,366      |
| PHYSICAL MEDICINE AND REHAB (PM)       | 348,622      |
| EMERGENCY MEDICINE (EM)                | 331,833      |
| OTHER SPECIALTY (OS)                   | 297,251      |
| CRITICAL CARE MEDICINE (CCM)           | 255,352      |
| NEPHROLOGY (NEP)                       | 235,647      |
| UROLOGY (U)                            | 226,721      |
| THORACIC SURGERY (TS)                  | 225,508      |
| CARDIOVASCULAR SURGERY (CDS)           | 219,539      |
| HEMATOLOGY/ONCOLOGY (HO)               | 199,818      |
| VASCULAR SURGERY (VS)                  | 198,145      |
| TRAUMA SURGERY (TRS)                   | 171,277      |
| NEUROLOGY (N)                          | 170,404      |
| OBSTETRICS (OBS)                       | 141,561      |
| COLON/RECTAL SURGERY (CRS)             | 141,120      |
| PULMONARY CRITICAL CARE MEDICINE (PCC) | 100,151      |

|                                         |        |
|-----------------------------------------|--------|
| PEDIATRIC CRITICAL CARE MEDICINE (CCP)  | 92,561 |
| GYNECOLOGICAL ONCOLOGY (GO)             | 84,902 |
| CERTIFIED NURSE MIDWIFE (CNM)           | 80,432 |
| MEDICAL ONCOLOGY (ON)                   | 79,390 |
| INTERVENTIONAL CARDIOLOGY               | 73,798 |
| GASTROENTEROLOGY (GE)                   | 73,657 |
| MATERNAL AND FETAL MEDICINE (MFM)       | 73,394 |
| CHILD AND ADOLESCENT PSYCHIATRY (CHP)   | 72,002 |
| GERIATRICS - INTERNAL MEDICINE (IMG)    | 63,311 |
| GENERAL PRACTICE (GP)                   | 63,155 |
| SURGICAL CRITICAL CARE (CCS)            | 62,820 |
| INTENSIVIST (INT)                       | 62,410 |
| INFECTIOUS DISEASES (ID)                | 61,761 |
| GYNECOLOGY (GYN)                        | 60,553 |
| PEDIATRIC HEMATOLOGY/ONCOLOGY (PHO)     | 57,319 |
| PLASTIC SURGERY (PS)                    | 52,931 |
| PEDIATRIC SURGERY (PDS)                 | 47,671 |
| OTOLARYNGOLOGY (OTO)                    | 46,239 |
| NURSE PRACTITIONER (ARNP)               | 45,990 |
| ORTHOPEDIC SURGERY OF THE SPINE (OSS)   | 40,801 |
| SURGICAL ONCOLOGY (SO)                  | 35,813 |
| CARDIAC ELECTROPHYSIOLOGY (ICE)         | 34,263 |
| ANESTHESIOLOGY (AN)                     | 33,296 |
| PODIATRY (POD)                          | 27,802 |
| ENDOCRINOLOGY AND METABOLISM (END)      | 27,738 |
| GERIATRIC MEDICINE - FAMILY PRAC. (FPG) | 26,737 |
| HEMATOLOGY (HEM)                        | 24,599 |
| TRANSPLANT SURGERY (TTS)                | 22,886 |
| SPORTS MEDICINE - ORTHOPEDICS (OSM)     | 17,005 |
| PHYSICIAN ASSISTANT (DRA)               | 15,025 |
| PEDIATRIC GASTROENTEROLOGY (PG)         | 14,909 |

|                                         |        |
|-----------------------------------------|--------|
| HEMATOLOGY (HMP)                        | 14,270 |
| RHEUMATOLOGY (RHU)                      | 12,860 |
| DENTAL/ORAL SURGERY (DOR)               | 12,790 |
| PEDIATRIC PULMONOLOGY (PDP)             | 12,645 |
| ADDICTION MEDICINE (ADM)                | 11,677 |
| ADOLESCENT MEDICINE (ADL)               | 11,538 |
| PEDIATRIC NEPHROLOGY (PN)               | 11,536 |
| PEDIATRIC INFECTIOUS DISEASES (PDI)     | 11,382 |
| PEDIATRIC EMERGENCY MEDICINE (PEM)      | 11,054 |
| PEDIATRIC CARDIOLOGY (PDC)              | 10,281 |
| HAND SURGERY (HS)                       | 10,273 |
| PSYCHOANALYSIS (PYA)                    | 9,921  |
| PAIN MANAGEMENT (APM)                   | 9,236  |
| PEDIATRIC NEUROLOGY (CHN)               | 8,820  |
| VASC. & INTERVENTIONAL RADIOLOGY (VIR)  | 8,050  |
| HOSPICE & PALLIATIVE CARE               | 7,694  |
| RADIOLOGY - DIAGNOSTIC (DR)             | 7,337  |
| CERTIFIED REG. NURSE ANESTHETIST (CRNA) | 7,067  |
| RADIOLOGY (R)                           | 6,868  |
| ABDOMINAL SURGERY (AS)                  | 6,725  |
| RADIATION ONCOLOGY (RO)                 | 6,093  |
| PEDIATRIC ORTHOPEDICS (OP)              | 5,976  |
| OPHTHALMOLOGY (OPH)                     | 5,900  |
| PEDIATRIC SURGERY - NEUROLOGICAL (NSP)  | 5,247  |
| ALLERGY AND IMMUNOLOGY (AI)             | 4,745  |
| MEDICAL GENETICS (MG)                   | 4,503  |
| PEDIATRIC ALLERGY (PDA)                 | 4,327  |
| NUCLEAR MEDICINE (NM)                   | 4,116  |
| REPRODUCTIVE ENDOCRINOLOGY (REN)        | 4,003  |
| DERMATOLOGY (D)                         | 3,986  |
| SPORTS MEDICINE (FSM)                   | 3,540  |

|                                          |       |
|------------------------------------------|-------|
| PEDIATRIC ENDOCRINOLOGY (PDE)            | 3,336 |
| PEDIATRIC UROLOGY (UP)                   | 2,557 |
| SLEEP MEDICINE                           | 2,533 |
| OCCUPATIONAL MEDICINE (OM)               | 2,460 |
| MAXILLOFACIAL SURGERY                    | 2266  |
| ALLERGY (A)                              | 2,115 |
| ANATOMIC/CLINICAL PATHOLOGY (PTH)        | 2,000 |
| SPORTS & INTERNAL MEDICINE (ISM)         | 1,413 |
| GENERAL PREVENTATIVE MEDICINE (GPM)      | 1,254 |
| NEUROPATHOLOGY (NP)                      | 1,237 |
| OSTEOPATHIC MANIPULATIVE MEDICINE (OMM)  | 1,210 |
| CLINICAL GENETICS (CG)                   | 1,149 |
| LEGAL MEDICINE (LM)                      | 1,072 |
| PEDIATRIC OTOLARYNGOLOGY (PDO)           | 1,046 |
| HEAD AND NECK SURGERY (HNS)              | 1,017 |
| CLINICAL PHARMACOLOGY (PA)               | 905   |
| CHIROPRACTICE (CRP)                      | 780   |
| FACIAL PLASTIC SURGERY (FPS)             | 744   |
| NUCLEAR RADIOLOGY (NR)                   | 579   |
| DIABETES (DIA)                           | 565   |
| NEURORADIOLOGY (RNR)                     | 522   |
| PUBLIC HLTH & GEN?L PREV. MEDICINE (PHP) | 508   |
| DERMATOPATHOLOGY (DMP)                   | 460   |
| NUTRITION (NTR)                          | 458   |
| CLINICAL PATHOLOGY (CLP)                 | 388   |
| PSYCHOLOGIST, CLINICAL                   | 256   |
| CLINICAL NEUROPHYSIOLOGY (CN)            | 230   |
| PEDIATRIC OPHTHALMOLOGY (PO)             | 220   |
| PEDIATRIC RHEUMATOLOGY (PPR)             | 200   |
| CERTIFIED CLINICAL NURSE SPECIALIST      | 174   |
| ANATOMIC PATHOLOGY (ATP)                 | 146   |



|                           |     |
|---------------------------|-----|
| IMMUNOLOGY (IG)           | 146 |
| CHEMICAL PATHOLOGY (PCH)  | 125 |
| PHYSICAL THERAPY          | 18  |
| OCCUPATIONAL THERAPY      | 14  |
| PEDIATRIC RADIOLOGY (PDR) | 14  |
| OPTOMETRY                 | 10  |

**Supplementary Table 4.** Admission Type (where available).

| Admission Type | # Admissions |
|----------------|--------------|
| EMERGENCY      | 22,237,533   |
| ELECTIVE       | 8,868,840    |
| URGENT         | 6,657,028    |
| NEWBORN        | 4,352,538    |
| TRAUMA CENTER  | 357,779      |

**Supplementary Table 5.** Major Diagnostic Category Assigned.

| Major Diagnostic Category | Category Name                  | # Admission |
|---------------------------|--------------------------------|-------------|
| 5                         | DISEASES/DISORDER/CIRC SYSTEM  | 5,316,778   |
| 14                        | PREG/CHILDBIRTH/PUERPERIUM     | 5,128,548   |
| 15                        | NEWBORNS/OTHER NEONATES        | 4,555,578   |
| 4                         | DISEASES/DISORDER/RESP SYSTEM  | 4,027,823   |
| 8                         | DISEASES/DISORDER/MS SYSTEM    | 3,927,870   |
| 6                         | DISEASES/DISORDER/DIGES SYSTEM | 3,587,412   |
| 18                        | INFECTIOUS AND PARASITIC DISEA | 2,864,044   |
| 1                         | DISEASES/DISORDER/NERV SYSTEM  | 2,514,318   |
| 11                        | DISEASES/DISORDER/KIDNEY/UT    | 2,039,612   |
| 19                        | MENTAL DISEASES AND DISORDERS  | 1,978,047   |
| 10                        | DISEASES/DISORDER/ENDOC/METAB  | 1,295,756   |
| 7                         | DISEASE/DISORDER/HEPATOBI/PANC | 1,279,618   |
| 9                         | DISEASES/DISORDER/SKIN/SQ TISS | 969,806     |
| 21                        | INJ/POISONING/TOXIC EFFECTS/DR | 563,563     |
| 20                        | ALCOHOL/DRUG USE/INDUCED MENTA | 530,731     |
| 23                        | FACTORS INFLUENC HEALTH STATUS | 529,450     |
| 16                        | DISEASE/DISORDER/BLD/BLD FORMI | 498,960     |
| 13                        | DISEASES/DISORDER/FEMALE REP   | 352,369     |

|    |                                |         |
|----|--------------------------------|---------|
| 17 | DISEASE/DISORDER/MYELOPROLIFER | 296,020 |
| 3  | DISEAS/DISORDER/EAR,NOSE,MOUT  | 292,849 |
| 12 | DISEASES/DISORDER/MALE REP SYS | 117,478 |
| 24 | MULTIPLE SIGNIFICANT TRAUMA    | 110,990 |
| 25 | HIV INFECTIONS                 | 59,706  |
| 2  | DISEASES/DISORDER/EYE          | 38,184  |
| 22 | BURNS                          | 18,806  |

**Supplementary Table 6.** Medicare Severity-Diagnosis Related Group (MS-DRG) Assigned.

| MS-DRG | MS-DRG Description                       | # Admissions |
|--------|------------------------------------------|--------------|
| 795    | NORMAL NEWBORN                           | 2,776,356    |
| 775    | VAGINAL DELIVERY W/O COMPLICATING DX     | 2,430,494    |
| 885    | PSYCHOSES                                | 1,562,790    |
| 871    | SEPTICEMIA/SEVR SEPSIS W/OMV >96HRS WMCC | 1,485,867    |
| 470    | MJR JNT RPLCMNT/RTTHMNT OF LWR ET W/OMCC | 1,302,965    |
| 766    | CESAREAN SECTION W/O CC/MCC              | 1,000,358    |
| 794    | NEONATE W OTHER SIGNIFICANT PROBLEMS     | 987,182      |
| 291    | HEART FAILURE & SHOCK W MCC              | 716,856      |
| 765    | CESAREAN SECTION W CC/MCC                | 677,839      |
| 392    | ESOPHAGITIS, GI&MSC DIGST DISORDR W/OMCC | 675,592      |
| 872    | SEPTICEMIA/SEVR SEPSS W/OMV >96HRSW/OMCC | 570,280      |
| 603    | CELLULITIS W/O MCC                       | 525,893      |
| 189    | PULMONARY EDEMA & RESPIRATORY FAILURE    | 445,481      |
| 774    | VAGINAL DELIVERY W COMPLICATING DX       | 433,856      |
| 683    | RENAL FAILURE W CC                       | 412,598      |
| 190    | CHRONIC OBSTRUCTIVE PULMNRY DISEASE WMCC | 400,233      |
| 897    | ALC/DRUG ABUSE OR DEPND W/O REHAB W/OMCC | 399,245      |
| 690    | KIDNEY & URINARY TRACT INFECTIONS W/OMCC | 397,738      |
| 292    | HEART FAILURE & SHOCK W CC               | 396,130      |
| 193    | SIMPLE PNEUMONIA & PLEURISY W MCC        | 391,168      |

|     |                                          |         |
|-----|------------------------------------------|---------|
| 194 | SIMPLE PNEUMONIA & PLEURISY W CC         | 386,348 |
| 378 | G.I. HEMORRHAGE W CC                     | 384,657 |
| 247 | PERC CRDVSC PX W DRUG-ELUT STENT W/O MCC | 323,993 |
| 65  | INTRACRNIAL HEM OR CEREBRAL INFARCT WCC  | 317,635 |
| 682 | RENAL FAILURE W MCC                      | 316,965 |
| 853 | INFECTIOUS & PARASITIC DIS W OR PX WMCC  | 274,883 |
| 641 | MISC DISORD NUTR,METABL,FLD/ELCTR WO MCC | 272,363 |
| 793 | FULL TERM NEONATE W MAJOR PROBLEMS       | 272,253 |
| 191 | CHRONIC OBSTRUCTIVE PULMONRY DISEASE WCC | 262,319 |
| 460 | SPINAL FUSION EXCEPT CERVICAL W/O MCC    | 254,288 |
| 638 | DIABETES W CC                            | 245,239 |
| 945 | REHABILITATION W CC/MCC                  | 238,268 |
| 792 | PREMATURITY W/O MAJOR PROBLEMS           | 236,535 |
| 330 | MAJOR SMALL & LARGE BOWEL PX W CC        | 235,441 |
| 287 | CIRC DISORDRS EXC AMI, W CRD CATH W/OMCC | 224,784 |
| 309 | CARD ARRHYTHMIA & CONDUCT DISORDERS WCC  | 224,382 |
| 812 | RED BLOOD CELL DISORDERS W/O MCC         | 219,580 |
| 64  | INTRACRNIAL HEM OR CEREBRAL INFARCT WMCC | 218,146 |
| 481 | HIP & FEMUR PX EXCEPT MAJOR JOINT W CC   | 213,091 |
| 177 | RESPIRATORY INFECT & INFLAMMATIONS W MCC | 193,413 |
| 101 | SEIZURES W/O MCC                         | 190,518 |
| 689 | KIDNEY & URINARY TRACT INFECTIONS W MCC  | 189,943 |
| 208 | RESPIRATORY SYS DX W VENT SUPPORT <=96 H | 185,556 |
| 280 | ACUTE MI, DISCHARGED ALIVE W MCC         | 184,516 |
| 881 | DEPRESSIVE NEUROSES                      | 183,397 |
| 308 | CARD ARRHYTHMIA & CONDUCT DISORDERS WMCC | 181,750 |
| 312 | SYNCOPE & COLLAPSE                       | 181,620 |
| 202 | BRONCHITIS & ASTHMA W CC/MCC             | 181,284 |
| 640 | MISC DISORD NUTR,METABL,FLD/ELCTRL W MCC | 166,288 |
| 310 | CARD ARRHYTH&CONDUCT DISORDERS W/OCC/MCC | 162,312 |
| 439 | DISORDER OF PANCREAS EXC MALIGNANCY W CC | 161,339 |

|     |                                           |         |
|-----|-------------------------------------------|---------|
| 917 | POISONING & TOXIC EFFECTS OF DRUGS W MCC  | 160,630 |
| 377 | G.I. HEMORRHAGE W MCC                     | 160,629 |
| 552 | MEDICAL BACK PROBLEMS W/O MCC             | 159,816 |
| 195 | SIMPLE PNEUMONIA & PLEURISY W/O CC/MCC    | 150,440 |
| 389 | G.I. OBSTRUCTION W CC                     | 150,340 |
| 781 | OTH ANTEPARTUM DX W MEDICAL COMPLICATION  | 148,762 |
| 203 | BRONCHITIS & ASTHMA W/O CC/MCC            | 144,612 |
| 57  | DEGENERATIV NRVIOUS SYSTM DISORDRS W/OMCC | 142,676 |
| 743 | UTERINE&ADNEXA PX NONMALIGNACY W/OCC/MCC  | 138,044 |
| 192 | CHRONIC OBSTRUCTV PULM DISEASE W/OCC/MCC  | 135,093 |
| 331 | MAJOR SMALL & LARGE BOWEL PX W/O CC/MCC   | 134,553 |
| 918 | POISONING&TOXIC EFFECTS OF DRUGS W/O MCC  | 133,184 |
| 329 | MAJOR SMALL & LARGE BOWEL PX W MCC        | 132,173 |
| 394 | OTHER DIGESTIVE SYSTEM DIAGNOSES W CC     | 130,935 |
| 313 | CHEST PAIN                                | 130,507 |
| 419 | LAPSCP CHOLECYSTECTOMY W/O CDE W/OCC/MCC  | 130,491 |
| 246 | PRC CRDVSCPX W DRGELT ST WMCC OR 4+VS/ST  | 129,482 |
| 391 | ESOPHAGITIS, GI & MSC DIGST DISORDR WMCC  | 128,907 |
| 698 | OTHER KIDNEY & URINARY TRACT DX W MCC     | 128,121 |
| 176 | PULMONARY EMBOLISM W/O MCC                | 127,999 |
| 790 | EXTREME IMMATUREITY OR RDS, NEONATE       | 126,748 |
| 66  | INTRCRNIAL HEM/CEREBRL INFARCT W/OCC/MCC  | 125,511 |
| 314 | OTHER CIRCULATORY SYSTEM DIAGNOSES W MCC  | 124,071 |
| 791 | PREMATURITY W MAJOR PROBLEMS              | 123,055 |
| 390 | G.I. OBSTRUCTION W/O CC/MCC               | 118,589 |
| 418 | LAPRSCOPIC CHOLECYSTECTOMY W/O CDE W CC   | 118,502 |
| 69  | TRANSIENT ISCHEMIA                        | 115,630 |
| 281 | ACUTE MI, DISCHARGED ALIVE W CC           | 114,445 |
| 621 | O.R. PROCEDURES FOR OBESITY W/O CC/MCC    | 112,080 |
| 293 | HEART FAILURE & SHOCK W/O CC/MCC          | 111,076 |
| 440 | DISORDER OF PANCREAS EXC MALIG W/OCC/MCC  | 110,675 |

|     |                                          |         |
|-----|------------------------------------------|---------|
| 948 | SIGNS & SYMPTOMS W/O MCC                 | 110,119 |
| 286 | CIRC DISORDERS EXC AMI, W CARD CATH WMCC | 105,596 |
| 637 | DIABETES W MCC                           | 105,462 |
| 372 | MJR GI DISORDRS & PERITONEAL INFECT WCC  | 104,567 |
| 870 | SEPTICEMIA OR SEVERE SEPSIS WMV >96 HOUR | 102,306 |
| 300 | PERIPHERAL VASCULAR DISORDERS W CC       | 96,469  |
| 253 | OTHER VASCULAR PROCEDURES W CC           | 95,693  |
| 178 | RESPIRATORY INFECT & INFLAMMATIONS W CC  | 95,088  |
| 639 | DIABETES W/O CC/MCC                      | 94,300  |
| 981 | EXT OR PX UNRELATED TO PRINCIPAL DX WMCC | 94,231  |
| 854 | INFECTIOUS & PARASITIC DIS W OR PX W CC  | 93,773  |
| 100 | SEIZURES W MCC                           | 89,986  |
| 494 | LWR EXT&HMR PX EXC HIP,FT,FMR W/OCC/MCC  | 89,401  |
| 699 | OTHER KIDNEY & URINARY TRACT DX W CC     | 85,864  |
| 252 | OTHER VASCULAR PROCEDURES W MCC          | 85,026  |
| 847 | CHEMO W/O ACUTE LEUKEMIA SECONDR DX W CC | 83,729  |
| 807 | VAG DELIV W/O STERILIZATION/D&C W/O CC/M | 83,591  |
| 236 | CORONARY BYPASS W/O CARDIAC CATH W/O MCC | 83,155  |
| 207 | RESPIRATORY SYS DX W VENT SUPPORT >96HRS | 82,906  |
| 305 | HYPERTENSION W/O MCC                     | 82,707  |
| 493 | LWR EXT&HUMER PX EXC HIP,FOOT,FEMUR W CC | 82,047  |
| 25  | CRANIOTOMY&ENDOVASC INTRACRANIAL PX WMCC | 80,141  |
| 767 | VAGINAL DELIVERY W STERILIZATION&/OR D&C | 79,522  |
| 74  | CRANIAL&PERIPHERAL NERVE DISORDRS W/OMCC | 79,320  |
| 175 | PULMONARY EMBOLISM W MCC                 | 79,049  |
| 234 | CORONARY BYPASS W CARDIAC CATH W/O MCC   | 78,532  |
| 602 | CELLULITIS W MCC                         | 77,625  |
| 811 | RED BLOOD CELL DISORDERS W MCC           | 77,568  |
| 442 | DSRDRS LIVER EXC MALG,CIRR,ALC HEPA W CC | 77,397  |
| 482 | HIP & FEMUR PX EXC MAJOR JOINT W/OCC/MCC | 77,162  |
| 884 | ORGANIC DISTURBANCES&MENTAL RETARDATION  | 75,048  |

|     |                                           |        |
|-----|-------------------------------------------|--------|
| 480 | HIP & FEMUR PX EXCEPT MAJOR JOINT W MCC   | 74,681 |
| 166 | OTHER RESP SYSTEM O.R. PROCEDURES W MCC   | 73,721 |
| 432 | CIRRHOSIS & ALCOHOLIC HEPATITIS W MCC     | 72,090 |
| 441 | DSRDRS LIVER EXC MALG,CIRR,ALC HEPA WMCC  | 72,011 |
| 153 | OTITIS MEDIA & URI W/O MCC                | 70,070 |
| 417 | LAPROSCOPIC CHOLECYSTECTOMY W/O CDE W MCC | 69,529 |
| 469 | MJR JNT RPLCMNT/RTTHMNT OF LWR EXT WMCC   | 69,431 |
| 3   | ECMO/TRCHWMV>96HR/PDXEXFCE/MTH&NCKW/MJOR  | 68,953 |
| 220 | CRD VLV&OTH MJ CD/THR PX W/O CRD CTH WCC  | 68,430 |
| 742 | UTERINE&ADNEXA PX NONMALIGNANCY WCC/MCC   | 68,060 |
| 103 | HEADACHES W/O MCC                         | 67,593 |
| 393 | OTHER DIGESTIVE SYSTEM DIAGNOSES W MCC    | 66,746 |
| 92  | OTHER DISORDERS OF NERVOUS SYSTEM W CC    | 65,785 |
| 243 | PERMANENT CARDIAC PACEMAKER IMPLANT W CC  | 65,634 |
| 809 | MJR HEM/IMM DX EXC SCKL CL CRS&COAG W CC  | 65,341 |
| 563 | FX,SPN,STN&DSL EX FMR,HP,PLVS&TGH W/OMCC  | 63,408 |
| 467 | REVISION OF HIP OR KNEE REPLACEMENT W CC  | 63,360 |
| 438 | DISORDER OF PANCREAS EXC MALIGNANCY WMCC  | 63,257 |
| 180 | RESPIRATORY NEOPLASMS W MCC               | 63,015 |
| 315 | OTHER CIRCULATORY SYSTEM DIAGNOSES W CC   | 62,140 |
| 483 | MJR JNT&LMB REATTCHMNT PX UP EXT          | 61,562 |
| 982 | EXT OR PX UNRELATED TO PRINCIPAL DX W CC  | 61,494 |
| 684 | RENAL FAILURE W/O CC/MCC                  | 61,388 |
| 896 | ALC/DRUG ABUSE OR DEPEND W/O REHAB WMCC   | 61,342 |
| 863 | POSTOP&POST-TRAUMATIC INFECTIONS W/OMCC   | 60,639 |
| 379 | G.I. HEMORRHAGE W/O CC/MCC                | 60,636 |
| 386 | INFLAMMATORY BOWEL DISEASE W CC           | 59,599 |
| 219 | CRD VLV&OTH MJ CD/THR PX W/O CD CTH WMCC  | 59,326 |
| 164 | MAJOR CHEST PROCEDURES W CC               | 58,831 |
| 299 | PERIPHERAL VASCULAR DISORDERS W MCC       | 58,036 |
| 776 | POSTPARTUM & POST ABORTION DX W/O OR PX   | 57,262 |

|     |                                           |        |
|-----|-------------------------------------------|--------|
| 371 | MJR GI DISORDRS & PERITONEAL INFECT WMCC  | 57,202 |
| 946 | REHABILITATION W/O CC/MCC                 | 57,199 |
| 282 | ACUTE MI, DISCHARGED ALIVE W/O CC/MCC     | 57,125 |
| 694 | URINARY STONES W/O ESW LITHOTRIPTY W/OMCC | 55,323 |
| 536 | FRACTURES OF HIP & PELVIS W/O MCC         | 55,267 |
| 4   | TRCH WMV >96HR/PDXEXCFCE/MTH&NCKW/O MJOR  | 54,881 |
| 617 | AMP LWR LIMB ENDCRN,NTRT,&MTBL DIS W CC   | 54,709 |
| 433 | CIRRHOSIS & ALCOHOLIC HEPATITIS W CC      | 54,709 |
| 882 | NEUROSES EXCEPT DEPRESSIVE                | 54,004 |
| 560 | AFTERCARE,MUSCLSKELTL SYS&CONN TISS W CC  | 53,948 |
| 558 | TENDONITIS, MYOSITIS & BURSITIS W/O MCC   | 53,823 |
| 445 | DISORDERS OF THE BILIARY TRACT W CC       | 53,183 |
| 233 | CORONARY BYPASS W CARDIAC CATH W MCC      | 53,129 |
| 580 | OTHER SKIN, SUBCUT TISS & BREAST PX W CC  | 51,705 |
| 388 | G.I. OBSTRUCTION W MCC                    | 49,129 |
| 163 | MAJOR CHEST PROCEDURES W MCC              | 48,529 |
| 864 | FEVER                                     | 48,430 |
| 880 | ACUTE ADJSTMNT RXN&PSYCHOSOCIAL DYSFNCTN  | 47,564 |
| 468 | REVISION HIP/KNEE REPLACEMENT W/OCC/MCC   | 47,462 |
| 375 | DIGESTIVE MALIGNANCY W CC                 | 47,375 |
| 242 | PERMANENT CARDIAC PACEMAKER IMPLANT WMCC  | 46,351 |
| 473 | CERVICAL SPINAL FUSION W/O CC/MCC         | 46,280 |
| 395 | OTHER DIGESTIVE SYSTEM DX W/O CC/MCC      | 46,204 |
| 327 | STOMACH, ESOPHAGEAL & DUODENAL PROC W CC  | 46,010 |
| 91  | OTHER DISORDERS OF NERVOUS SYSTEM W MCC   | 45,794 |
| 336 | PERITONEAL ADHESIOLYSIS W CC              | 45,555 |
| 669 | TRANSURETHRAL PROCEDURES W CC             | 45,397 |
| 862 | POSTOP & POST-TRAUMATIC INFECTIONS W MCC  | 45,235 |
| 71  | NONSPECIFC CEREBROVASCULAR DISORDERS WCC  | 45,115 |
| 435 | MALIG OF HEPATOBILIARY SYS/PANCREAS WMCC  | 44,733 |
| 56  | DEGENERATIVE NERVOUS SYSTM DISORDRS WMCC  | 44,687 |



|     |                                          |        |
|-----|------------------------------------------|--------|
| 326 | STOMACH, ESOPHAGEAL & DUODENAL PROC WMCC | 44,169 |
| 86  | TRAUMATIC STUPOR & COMA, COMA <1 HR W CC | 44,144 |
| 920 | COMPLICATIONS OF TREATMENT W CC          | 43,935 |
| 54  | NERVOUS SYSTEM NEOPLASMS W MCC           | 43,544 |
| 249 | PERC CRDVSCPX W NONDRUGELUT STENT W/OMCC | 43,543 |
| 244 | PERM CARDIAC PACEMAKER IMPLANT W/OCC/MCC | 43,335 |
| 813 | COAGULATION DISORDERS                    | 43,312 |
| 70  | NONSPEC CEREBROVASCULAR DISORDERS WMCC   | 43,304 |
| 462 | BILAT/MULT MJR JNT PX OF LWR EXT W/OMCC  | 43,299 |
| 373 | MJR GI DISORDRS&PERITNL INFECT W/OCC/MCC | 43,162 |
| 167 | OTHER RESP SYSTEM O.R. PROCEDURES W CC   | 42,712 |
| 181 | RESPIRATORY NEOPLASMS W CC               | 42,163 |
| 340 | APPENDECTOMY W COMPLICATED PDX W/OCC/MCC | 41,955 |
| 251 | PERC CRDVSC PX W/O CRNRY ART STNT W/OMCC | 41,733 |
| 254 | OTHER VASCULAR PROCEDURES W/O CC/MCC     | 40,689 |
| 644 | ENDOCRINE DISORDERS W CC                 | 40,578 |
| 149 | DYSEQUILIBRIUM                           | 40,444 |
| 581 | OTH SKIN,SUBCUT TISS&BREAST PX W/OCC/MCC | 40,319 |
| 857 | POSTOP/POST-TRAUMA INFECT W OR PX W CC   | 40,241 |
| 949 | AFTERCARE W CC/MCC                       | 39,064 |
| 472 | CERVICAL SPINAL FUSION W CC              | 38,690 |
| 27  | CRANIOTMY&ENDVSC INTRCRANIALPX W/OCC/MCC | 38,667 |
| 264 | OTHER CIRCULATORY SYSTEM O.R. PROCEDURES | 38,559 |
| 464 | WND DBD&GRFT EXC HND,MSCLCNN TSS DS W CC | 38,555 |
| 866 | VIRAL ILLNESS W/O MCC                    | 38,525 |
| 778 | THREATENED ABORTION                      | 38,383 |
| 235 | CORONARY BYPASS W/O CARDIAC CATH W MCC   | 37,508 |
| 343 | APPENDECTOMY W/O COMPLICTD PDX W/OCC/MCC | 37,465 |
| 988 | NON-EXT OR PX UNRELATED TO PRINC DX W CC | 37,364 |
| 444 | DISORDERS OF THE BILIARY TRACT W MCC     | 37,293 |
| 238 | MAJOR CARDIOVASC PROCEDURES W/O MCC(V32) | 37,246 |

|     |                                           |        |
|-----|-------------------------------------------|--------|
| 908 | OTHER O.R. PROCEDURES FOR INJURIES W CC   | 36,881 |
| 919 | COMPLICATIONS OF TREATMENT W MCC          | 36,867 |
| 301 | PERIPHERAL VASCULAR DISORDERS W/O CC/MCC  | 36,396 |
| 26  | CRANIOTOMY&ENDOVASC INTRACRANIAL PX WCC   | 36,327 |
| 947 | SIGNS & SYMPTOMS W MCC                    | 36,306 |
| 554 | BONE DISEASES & ARTHROPATHIES W/O MCC     | 36,203 |
| 556 | SIGNS&SYMP MSCLSKLTL SYS&CONN TIS W/OMCC  | 36,160 |
| 516 | OTH MUSCLOSKELET SYS&CONN TISS OR PX W CC | 36,140 |
| 543 | PATH FX & MSCLSKLT&CONN TISS MALIG W CC   | 35,993 |
| 660 | KIDNEY&URETER PX FOR NON-NEOPLASM W CC    | 35,728 |
| 165 | MAJOR CHEST PROCEDURES W/O CC/MCC         | 35,463 |
| 200 | PNEUMOTHORAX W CC                         | 35,435 |
| 328 | STOMACH, ESOPH & DUODENAL PROC W/OCC/MCC  | 35,201 |
| 788 | CESAREAN SECT W/O STERILIZATION W/O CC/M  | 35,000 |
| 895 | ALCOHOL/DRUG ABUSE OR DEPENDENCE W REHAB  | 34,571 |
| 551 | MEDICAL BACK PROBLEMS W MCC               | 34,327 |
| 354 | HERNIA PX EXCEPT INGUINAL & FEMORAL W CC  | 34,039 |
| 374 | DIGESTIVE MALIGNANCY W MCC                | 33,334 |
| 605 | SKIN, SUBCUT TISS & BREAST TRAUMA W/OMCC  | 33,250 |
| 894 | ALCOHOL/DRUG ABUSE OR DEPENDENCE,LEFTAMA  | 32,859 |
| 23  | CRNMJRDVIMPL/ACTCPLXCNS PDXWMCC/CHMO IMP  | 32,828 |
| 303 | ATHEROSCLEROSIS W/O MCC                   | 32,479 |
| 87  | TRAUM STUPOR&COMA, COMA <1 HR W/OCC/MCC   | 32,376 |
| 789 | NEONATES,DIED/TRANS ANTHR ACUTE CARE FAC  | 32,128 |
| 673 | OTHER KIDNEY & URINARY TRACT PX W MCC     | 32,008 |
| 387 | INFLAMMATORY BOWEL DISEASE W/O CC/MCC     | 31,394 |
| 907 | OTHER O.R. PROCEDURES FOR INJURIES W MCC  | 31,243 |
| 206 | OTHER RESPIRATORY SYSTEM DX W/O MCC       | 31,037 |
| 987 | NON-EXT OR PX UNRELATED TO PRINC DX WMCC  | 30,988 |
| 216 | CRD VLV&OTH MJ CRD/THR PX W CRD CTH WMCC  | 30,734 |
| 561 | AFTERCRE,MSCLSKLTL SYS&CON TIS W/OCC/MCC  | 30,667 |

|     |                                          |        |
|-----|------------------------------------------|--------|
| 85  | TRAUMATIC STUPOR & COMA, COMA <1 HR WMCC | 30,605 |
| 270 | OTHER MAJ CARDIO PX W MCC                | 30,594 |
| 355 | HERNIA PX EXC INGUINAL&FEMORAL W/OCC/MCC | 30,511 |
| 93  | OTH DISORDERS OF NERVOUS SYSTM W/OCC/MCC | 30,036 |
| 436 | MALIG OF HEPATOBILIARY SYS/PANCREAS W CC | 29,977 |
| 62  | ACUTE ISCHM STROKE W THROMBLYTC AGNT WCC | 29,936 |
| 204 | RESPIRATORY SIGNS & SYMPTOMS             | 29,845 |
| 446 | DISORDERS OF THE BILIARY TRACT W/OCC/MCC | 29,474 |
| 337 | PERITONEAL ADHESIOLYSIS W/O CC/MCC       | 29,458 |
| 186 | PLEURAL EFFUSION W MCC                   | 29,225 |
| 643 | ENDOCRINE DISORDERS W MCC                | 28,489 |
| 856 | POSTOP/POST-TRAUMA INFECT W OR PX WMCC   | 28,404 |
| 357 | OTHER DIGESTIVE SYSTEM O.R. PX W CC      | 28,199 |
| 237 | MAJOR CARDIOVASC PROCEDURES W MCC(V32)   | 28,165 |
| 184 | MAJOR CHEST TRAUMA W CC                  | 27,836 |
| 657 | KIDNEY & URETER PX FOR NEOPLASM W CC     | 27,566 |
| 455 | COMBND ANTR/POSTR SPINAL FUSN W/OCC/MCC  | 27,392 |
| 571 | SKIN DEBRIDEMENT W CC                    | 27,011 |
| 454 | COMBINED ANTR/POSTR SPINAL FUSION W CC   | 26,901 |
| 240 | AMP FR CIRC SYS DSRDR EXC UP LMB&TOE WCC | 26,704 |
| 501 | SOFT TISSUE PROCEDURES W CC              | 26,500 |
| 607 | MINOR SKIN DISORDERS W/O MCC             | 26,423 |
| 517 | OTH MSCLSKLT SYS&CNN TS OR PX W/O CC/MCC | 26,352 |
| 840 | LYMPHOMA & NON-ACUTE LEUKEMIA W MCC      | 25,855 |
| 974 | HIV W MAJOR RELATED CONDITION W MCC      | 25,748 |
| 356 | OTHER DIGESTIVE SYSTEM O.R. PX W MCC     | 25,671 |
| 808 | MJR HEM/IMM DX EXC SCKL CL CRS&COAG WMCC | 25,644 |
| 658 | KIDNEY&URETER PX FOR NEOPLASM W/OCC/MCC  | 25,621 |
| 708 | MAJOR MALE PELVIC PROCEDURES W/O CC/MCC  | 25,507 |
| 956 | LIMB REATT,HIP&FEMUR PX MULT SIG TRAUMA  | 25,432 |
| 239 | AMP FR CIRC SYS DSRDR EXC UP LMB&TO WMCC | 24,855 |

|     |                                          |        |
|-----|------------------------------------------|--------|
| 841 | LYMPHOMA & NON-ACUTE LEUKEMIA W CC       | 24,768 |
| 304 | HYPERTENSION W MCC                       | 24,656 |
| 271 | OTHER MAJ CARDIO PX W CC                 | 24,537 |
| 41  | PR/CRN NRV&OTH NRVSYS PXWCC/PRIPH NROSTM | 24,321 |
| 339 | APPENDECTOMY W COMPLICATED PDX W CC      | 24,305 |
| 728 | INFLAMMATION MALE REPRODUCTVE SYS W/OMCC | 24,229 |
| 620 | O.R. PROCEDURES FOR OBESITY W CC         | 24,096 |
| 886 | BEHAVIORAL & DEVELOPMENTAL DISORDERS     | 23,842 |
| 478 | BX MUSCULOSKELTL SYS&CONNECTVE TISS W CC | 23,485 |
| 883 | DISORDERS OF PERSONALITY&IMPULSE CONTROL | 23,417 |
| 179 | RESPIRATRY INFECT&INFLAMMATNS W/OCC/MCC  | 23,139 |
| 39  | EXTRACRANIAL PROCEDURES W/O CC/MCC       | 22,484 |
| 248 | PRC CRDVSCPX W NNDRGELT ST WMCC /4+VS/ST | 22,432 |
| 196 | INTERSTITIAL LUNG DISEASE W MCC          | 22,233 |
| 492 | LWR EXT&HUMER PX EXC HIP,FOOT,FEMUR WMCC | 22,147 |
| 520 | BCK/NCK PX EXC SPIN FUS W/OCC/MCC        | 22,140 |
| 227 | CARD DEFIB IMPLANT W/O CARD CATH W/OMCC  | 21,905 |
| 661 | KIDNEY&URETER PX NONNEOPLASM W/OCC/MCC   | 21,832 |
| 964 | OTHER MULTIPLE SIGNIFICANT TRAUMA W CC   | 21,697 |
| 629 | OTH ENDOCRINE, NUTRIT & METAB OR PX W CC | 21,582 |
| 187 | PLEURAL EFFUSION W CC                    | 21,548 |
| 38  | EXTRACRANIAL PROCEDURES W CC             | 21,530 |
| 73  | CRANIAL&PERIPHERAL NERVE DISORDERS WMCC  | 21,324 |
| 274 | PERCUTANEOUS INTRACARDIAC PX W/O MCC     | 21,275 |
| 381 | COMPLICATED PEPTIC ULCER W CC            | 21,160 |
| 267 | ENDOVASC CARD VALV REPL W/OMCC           | 20,838 |
| 519 | BCK/NCK PX EXC SPIN FUS W CC             | 20,821 |
| 546 | CONNECTIVE TISSUE DISORDERS W CC         | 20,705 |
| 623 | SKN GRFT&WND DBRD ENDC,NTRT&MTB DIS W CC | 20,641 |
| 674 | OTHER KIDNEY & URINARY TRACT PX W CC     | 20,425 |
| 951 | OTHER FACTORS INFLUENCING HEALTH STATUS  | 20,408 |

|     |                                          |        |
|-----|------------------------------------------|--------|
| 335 | PERITONEAL ADHESIOLYSIS W MCC            | 20,211 |
| 205 | OTHER RESPIRATORY SYSTEM DIAGNOSES W MCC | 20,156 |
| 55  | NERVOUS SYSTEM NEOPLASMS W/O MCC         | 20,083 |
| 384 | UNCOMPLICATED PEPTIC ULCER W/O MCC       | 19,868 |
| 782 | OTH ANTEPARTUM DX W/O MEDICAL COMPLICATN | 19,726 |
| 958 | OTH OR PX MULT SIGNIFICANT TRAUMA W CC   | 19,709 |
| 250 | PERC CRDVSC PX W/O CORNRY ART STENT WMCC | 19,663 |
| 957 | OTH OR PX MULT SIGNIFICANT TRAUMA W MCC  | 19,552 |
| 283 | ACUTE MYOCARDIAL INFARCTION, EXPIRD WMCC | 19,031 |
| 199 | PNEUMOTHORAX W MCC                       | 18,916 |
| 443 | DSDR LVR EXC MALG,CIRR,ALCHEPA W/OCC/MCC | 18,850 |
| 806 | VAG DELIV W/O STERILIZATION/D&C W CC     | 18,706 |
| 369 | MAJOR ESOPHAGEAL DISORDERS W CC          | 18,596 |
| 645 | ENDOCRINE DISORDERS W/O CC/MCC           | 18,374 |
| 565 | OTH MUSCULOSKELETL SYS&CONN TISS DX W CC | 18,288 |
| 983 | EXT OR PX UNRELATE TO PRIN DX W/O CC/MCC | 18,197 |
| 463 | WND DBD&GRFT EXC HND,MSCLCNN TSS DS WMCC | 18,146 |
| 542 | PATH FX & MSCLSKLT&CONN TISS MALIG WMCC  | 18,112 |
| 60  | MULT SCLERSIS&CEREBELLR ATAXIA W/OCC/MCC | 17,864 |
| 559 | AFTERCARE,MUSCLSKELTL SYS&CONN TISS WMCC | 17,736 |
| 579 | OTHER SKIN, SUBCUT TISS & BREAST PX WMCC | 17,649 |
| 266 | ENDOASC CARD VALV REPL WMCC              | 17,481 |
| 696 | KIDNEY&URINARY TRACT SIGNS&SYMPT W/OMCC  | 17,319 |
| 406 | PANCREAS, LIVER & SHUNT PROCEDURES W CC  | 17,212 |
| 535 | FRACTURES OF HIP & PELVIS W MCC          | 17,209 |
| 491 | BACK&NECK PX EXC SPINAL FUSION W/OCC/MCC | 17,182 |
| 405 | PANCREAS, LIVER & SHUNT PROCEDURES W MCC | 17,060 |
| 158 | DENTAL & ORAL DISEASES W CC              | 17,012 |
| 29  | SPINAL PX WCC OR SPINAL NEUROSTIMULATORS | 16,938 |
| 459 | SPINAL FUSION EXCEPT CERVICAL W MCC      | 16,677 |
| 975 | HIV W MAJOR RELATED CONDITION W CC       | 16,637 |

|     |                                          |        |
|-----|------------------------------------------|--------|
| 40  | PERIPH/CRANIAL NERV&OTH NERV SYS PX WMCC | 16,532 |
| 201 | PNEUMOTHORAX W/O CC/MCC                  | 16,528 |
| 155 | OTHER EAR, NOSE, MOUTH & THROAT DX W CC  | 16,262 |
| 909 | OTHER O.R. PX FOR INJURIES W/O CC/MCC    | 16,111 |
| 700 | OTHER KIDNEY&URINARY TRACT DX W/OCC/MCC  | 16,073 |
| 152 | OTITIS MEDIA & URI W MCC                 | 15,637 |
| 834 | ACUTE LEUKEMIA W/O MAJOR O.R. PX W MCC   | 15,415 |
| 226 | CARDIAC DEFIB IMPLANT W/O CARD CATH WMCC | 15,319 |
| 562 | FX,SPN,STN&DISL EX FMR,HP,PLVS&THGH WMCC | 15,288 |
| 457 | SP FS EXC CRV W SP CRV/MLG/INF /9+FS WCC | 15,193 |
| 846 | CHEMO W/O ACUTE LEUKEMIA SECONDR DX WMCC | 15,050 |
| 229 | OTHER CARDIOTHORACIC PROCEDURES W/O MCC  | 14,949 |
| 316 | OTHER CIRC SYSTEM DIAGNOSES W/O CC/MCC   | 14,940 |
| 348 | ANAL & STOMAL PROCEDURES W CC            | 14,877 |
| 83  | TRAUMATIC STUPOR & COMA, COMA >1 HR WCC  | 14,870 |
| 540 | OSTEOMYELITIS W CC                       | 14,845 |
| 59  | MULTIPLE SCLEROSIS&CEREBELLAR ATAXIA WCC | 14,702 |
| 61  | ACUTE ISCHM STROKE W THROMBLYT AGNT WMCC | 14,693 |
| 652 | KIDNEY TRANSPLANT                        | 14,644 |
| 502 | SOFT TISSUE PROCEDURES W/O CC/MCC        | 14,626 |
| 345 | MINOR SMALL & LARGE BOWEL PX W CC        | 14,475 |
| 490 | BCK&NCKPX EXC SFS WCC/MCC OR DSC DV/NRST | 14,444 |
| 221 | CD VLV&OT MJ CD/TRPXW/O CD CTH W/OCC/MCC | 14,419 |
| 572 | SKIN DEBRIDEMENT W/O CC/MCC              | 14,344 |
| 342 | APPENDECTOMY W/O COMPLICATED PDX W CC    | 14,120 |
| 839 | CHEMO W ACUTE LEUKEMIA AS SDX W/O CC/MCC | 14,001 |
| 921 | COMPLICATIONS OF TREATMENT W/O CC/MCC    | 13,942 |
| 787 | CESAREAN SECT W/O STERILIZATION W CC     | 13,927 |
| 515 | OTH MUSCLOSKELT SYS&CONN TISS OR PX WMCC | 13,785 |
| 737 | UTER&ADNX PX OVARIAN/ADNEXAL MALIG W CC  | 13,779 |
| 707 | MAJOR MALE PELVIC PROCEDURES W CC/MCC    | 13,762 |

|     |                                          |        |
|-----|------------------------------------------|--------|
| 76  | VIRAL MENINGITIS W/O CC/MCC              | 13,704 |
| 916 | ALLERGIC REACTIONS W/O MCC               | 13,661 |
| 183 | MAJOR CHEST TRAUMA W MCC                 | 13,544 |
| 82  | TRAUMATIC STUPOR & COMA, COMA >1 HR WMCC | 13,427 |
| 475 | AMP FOR MSCLSKLTL SYS&CONN TISS DIS W CC | 13,306 |
| 504 | FOOT PROCEDURES W CC                     | 13,302 |
| 512 | SHLDR,ELBW/FRM PX,EX MJR JNT PXW/OCC/MCC | 13,271 |
| 570 | SKIN DEBRIDEMENT W MCC                   | 13,246 |
| 769 | POSTPARTUM & POST ABORTION DX W OR PX    | 13,190 |
| 228 | OTHER CARDIOTHORACIC PROCEDURES W MCC    | 13,170 |
| 385 | INFLAMMATORY BOWEL DISEASE W MCC         | 13,164 |
| 545 | CONNECTIVE TISSUE DISORDERS W MCC        | 13,008 |
| 865 | VIRAL ILLNESS W MCC                      | 12,892 |
| 217 | CRD VLV&OTH MJ CRD/THR PX W CRD CTH WCC  | 12,884 |
| 415 | CHOLECYSTCTMY EXC BY LAPSCP W/O CDE W CC | 12,849 |
| 269 | AORTIC&HRT ASST PX EXC PULSN BLN W/O MCC | 12,755 |
| 380 | COMPLICATED PEPTIC ULCER W MCC           | 12,744 |
| 557 | TENDONITIS, MYOSITIS & BURSITIS W MCC    | 12,723 |
| 592 | SKIN ULCERS W MCC                        | 12,636 |
| 596 | MAJOR SKIN DISORDERS W/O MCC             | 12,587 |
| 511 | SHLDR,ELBW/FRARM PX,EXC MJR JNT PX WCC   | 12,569 |
| 659 | KIDNEY&URETER PX FOR NON-NEOPLASM W MCC  | 12,392 |
| 471 | CERVICAL SPINAL FUSION W MCC             | 12,355 |
| 488 | KNEE PX W/O PDX OF INFECTION W CC/MCC    | 12,344 |
| 125 | OTHER DISORDERS OF THE EYE W/O MCC       | 12,338 |
| 815 | RETICULOENDOTHELIAL & IMM DISORDERS W CC | 12,261 |
| 496 | LCL EXC&RMVL INT FIX DV EXC HIP&FMR WCC  | 12,181 |
| 867 | OTH INFECTIOUS & PARASITIC DIS DX W MCC  | 12,121 |
| 484 | MJR JNT&LMB RTTCHMNT PX UP EXT W/OCC/MCC | 12,046 |
| 72  | NONSPEC CEREBROVASC DISORDERS W/OCC/MCC  | 12,033 |
| 346 | MINOR SMALL & LARGE BOWEL PX W/O CC/MCC  | 11,996 |

|     |                                          |        |
|-----|------------------------------------------|--------|
| 989 | NON-EXT OR PX UNRELATD PRIN DX W/OCC/MCC | 11,942 |
| 273 | PERCUTANEOUS INTRACARDIAC PX W MCC       | 11,928 |
| 759 | INFECTNS,FEMALE REPRODUCTV SYS W/OCC/MCC | 11,816 |
| 134 | OTHER ENT & MOUTH O.R. PX W/O CC/MCC     | 11,767 |
| 593 | SKIN ULCERS W CC                         | 11,742 |
| 465 | WD DBD&GRFT EXC HND,MSCLCNN DS W/OCC/MCC | 11,723 |
| 713 | TRANSURETHRAL PROSTATECTOMY W CC/MCC     | 11,717 |
| 311 | ANGINA PECTORIS                          | 11,694 |
| 133 | OTHER ENT & MOUTH O.R. PX W CC/MCC       | 11,661 |
| 654 | MAJOR BLADDER PROCEDURES W CC            | 11,628 |
| 368 | MAJOR ESOPHAGEAL DISORDERS W MCC         | 11,491 |
| 84  | TRAUM STUPOR&COMA, COMA >1 HR W/O CC/MCC | 11,426 |
| 489 | KNEE PX W/O PDX OF INFECTION W/O CC/MCC  | 11,380 |
| 466 | REVISION OF HIP OR KNEE REPLACEMENT WMCC | 11,241 |
| 168 | OTHER RESP SYSTEM O.R. PX W/O CC/MCC     | 11,208 |
| 740 | UTER,ADNX PX NONOVARN/ADNEXAL MALIG W CC | 11,138 |
| 37  | EXTRACRANIAL PROCEDURES W MCC            | 11,061 |
| 810 | MJR HM/IM DX EX SCKL CL CRS&CG W/OCC/MCC | 11,003 |
| 349 | ANAL & STOMAL PROCEDURES W/O CC/MCC      | 10,945 |
| 963 | OTHER MULTIPLE SIGNIFICANT TRAUMA W MCC  | 10,821 |
| 837 | CHEM W AC LKM SDX/W HGH DS CHM AGNT WMCC | 10,813 |
| 197 | INTERSTITIAL LUNG DISEASE W CC           | 10,683 |
| 760 | MNSTRL&OTH FEMALE REPROD SYS DIS WCC/MCC | 10,608 |
| 353 | HERNIA PX EXCEPT INGUINAL & FEMORAL WMCC | 10,560 |
| 547 | CONNECTIVE TISSUE DISORDERS W/O CC/MCC   | 10,539 |
| 68  | NONSPCCVA&PRCRBRL OCCL W/O INFRCT W/OMCC | 10,439 |
| 755 | MALIGNANCY, FEMALE REPRODUCTIVE SYS W CC | 10,386 |
| 30  | SPINAL PROCEDURES W/O CC/MCC             | 10,373 |
| 668 | TRANSURETHRAL PROCEDURES W MCC           | 10,352 |
| 24  | CRN WMJRDEV IMPL/ACUTE CPLXCNS PDXW/OMCC | 10,314 |
| 914 | TRAUMATIC INJURY W/O MCC                 | 10,282 |



|     |                                          |        |
|-----|------------------------------------------|--------|
| 628 | OTH ENDOCRINE, NUTRIT & METAB OR PX WMCC | 10,203 |
| 758 | INFECTIONS, FEMALE REPRODUCTIVE SYS WCC  | 10,202 |
| 768 | VAGINAL DELV W OR PX EXC STERIL &/OR D&C | 10,175 |
| 123 | NEUROLOGICAL EYE DISORDERS               | 10,167 |
| 156 | OTHER ENT & MOUTH DIAGNOSES W/O CC/MCC   | 10,077 |
| 131 | CRANIAL/FACIAL PROCEDURES W CC/MCC       | 9,934  |
| 477 | BX MUSCULOSKELTL SYS&CONNECTVE TISS WMCC | 9,837  |
| 950 | AFTERCARE W/O CC/MCC                     | 9,824  |
| 333 | RECTAL RESECTION W CC                    | 9,820  |
| 935 | NON-EXTENSIVE BURNS                      | 9,660  |
| 656 | KIDNEY & URETER PX FOR NEOPLASM W MCC    | 9,626  |
| 351 | INGUINAL & FEMORAL HERNIA PX W CC        | 9,613  |
| 307 | CARDIAC CONGENTL & VALV DISORDERS W/OMCC | 9,533  |
| 868 | OTH INFECTIOUS & PARASITIC DIS DX W CC   | 9,511  |
| 513 | HND/WRST PX, EXC MJR THMB/JNT PX WCC/MCC | 9,457  |
| 642 | INBORN AND OTHER DISORDERS OF METABOLISM | 9,392  |
| 564 | OTH MUSCULOSKELETL SYS&CONN TISS DX WMCC | 9,379  |
| 616 | AMP LWR LIMB ENDCRN,NTRT,&MTBL DIS WMCC  | 9,368  |
| 824 | LYMPHOMA&NONACUTE LEUKM W OTH OR PX W CC | 9,339  |
| 539 | OSTEOMYELITIS W MCC                      | 9,330  |
| 302 | ATHEROSCLEROSIS W MCC                    | 9,233  |
| 977 | HIV W OR W/O OTHER RELATED CONDITION     | 9,227  |
| 486 | KNEE PROCEDURES W PDX OF INFECTION W CC  | 9,201  |
| 474 | AMP FOR MSCLSKLTL SYS&CONN TISS DIS WMCC | 9,178  |
| 544 | PATH FX & MSCLSKLT&CN TS MALIG W/OCC/MCC | 9,171  |
| 256 | UP LMB&TOE AMP FOR CIRC SYS DISORDER WCC | 9,096  |
| 416 | CHCYTCTMY EXC BY LPSCP W/O CDE W/OCC/MCC | 9,095  |
| 28  | SPINAL PROCEDURES W MCC                  | 9,093  |
| 458 | SPFS EXC CR W CR/MLG/INF/9+FS W/OCC/MCC  | 9,082  |
| 132 | CRANIAL/FACIAL PROCEDURES W/O CC/MCC     | 9,025  |
| 352 | INGUINAL & FEMORAL HERNIA PX W/O CC/MCC  | 8,957  |

|     |                                          |       |
|-----|------------------------------------------|-------|
| 75  | VIRAL MENINGITIS W CC/MCC                | 8,955 |
| 306 | CARDIAC CONGENITAL & VALV DISORDERS WMCC | 8,800 |
| 224 | CRD DFB IMP W CRD CTH W/OAMI/HF/SHK WMCC | 8,791 |
| 358 | OTHER DIGESTIVE SYSTEM O.R. PX W/OCC/MCC | 8,765 |
| 414 | CHOLECYSTCTMY EXC BY LAPSCP W/O CDE WMCC | 8,640 |
| 159 | DENTAL & ORAL DISEASES W/O CC/MCC        | 8,596 |
| 505 | FOOT PROCEDURES W/O CC/MCC               | 8,589 |
| 902 | WOUND DEBRIDEMENTS FOR INJURIES W CC     | 8,552 |
| 835 | ACUTE LEUKEMIA W/O MAJOR O.R. PX W CC    | 8,522 |
| 20  | INTRCRANIAL VASC PX WPDH HEMORRHAGE WMCC | 8,520 |
| 670 | TRANSURETHRAL PROCEDURES W/O CC/MCC      | 8,383 |
| 915 | ALLERGIC REACTIONS W MCC                 | 8,364 |
| 940 | OR PX W DX OF OTH CONT W HEALTH SRV W CC | 8,309 |
| 500 | SOFT TISSUE PROCEDURES W MCC             | 8,267 |
| 261 | CARD PACEMKR REV EXC DEV REPLACEMNT WCC  | 8,223 |
| 334 | RECTAL RESECTION W/O CC/MCC              | 8,188 |
| 555 | SIGNS&SYMP MSCLSKLTL SYS&CONN TISS WMCC  | 8,102 |
| 97  | NONBCT INFCT NRVSYS EXC VIRL MNNGTS WMCC | 8,093 |
| 42  | PERIPH/CRAN NERV&OTH NERVSYS PXW/OCC/MCC | 8,076 |
| 78  | HYPERTENSIVE ENCEPHALOPATHY W CC         | 8,040 |
| 687 | KIDNEY & URINARY TRACT NEOPLASMS W CC    | 8,013 |
| 838 | CHM W ACT LKM SDX WCC OR HGH DS CHM AGNT | 7,891 |
| 63  | ACT ISCHM STRK W THRMPLY AGNT W/OCC/MCC  | 7,878 |
| 32  | VENTRICULAR SHUNT PROCEDURES W CC        | 7,870 |
| 741 | UTR,ADNXPX NONOVAR/ADNXL MALIG W/OCC/MCC | 7,845 |
| 151 | EPISTAXIS W/O MCC                        | 7,816 |
| 923 | OTH INJRY,POISONING&TOXC EFFCT DX W/OMCC | 7,808 |
| 693 | URINARY STONES W/O ESW LITHOTRIPSY W MCC | 7,749 |
| 585 | BRST BX, LOC EXCIS&OTH BRST PX W/OCC/MCC | 7,740 |
| 95  | BACTERIAL&TB INFECTIONS OF NERV SYS WCC  | 7,740 |
| 614 | ADRENAL & PITUITARY PROCEDURES W CC/MCC  | 7,695 |

|     |                                          |       |
|-----|------------------------------------------|-------|
| 816 | RETICULOENDOTHEL&IMM DISORDERS W/OCC/MCC | 7,693 |
| 823 | LYMPHOMA&NONACUTE LEUKM W OTH OR PX WMCC | 7,666 |
| 272 | OTHER MAJ CARDIO PX W/O CC/MCC           | 7,614 |
| 604 | SKIN, SUBCUT TISS & BREAST TRAUMA WMCC   | 7,613 |
| 842 | LYMPHOMA & NON-ACUTE LEUKEMIA W/O CC/MCC | 7,529 |
| 922 | OTH INJURY,POISONING&TOXC EFFECT DX WMCC | 7,455 |
| 744 | D&C,CONIZATN,LAP&TUBAL INTERRUPT WCC/MCC | 7,351 |
| 479 | BX MUSCULOSKLTL SYS&CNNCTV TSS W/OCC/MCC | 7,340 |
| 407 | PANCREAS, LIVER & SHUNT PX W/O CC/MCC    | 7,323 |
| 225 | CRD DFB IP W CRD CTH W/OAMI/HF/SK W/OMCC | 7,309 |
| 858 | POSTOP/POSTTRAUM INFECT WOR PX W/OCC/MCC | 7,294 |
| 777 | ECTOPIC PREGNANCY                        | 7,273 |
| 583 | MASTECTOMY FOR MALIGNANCY W/O CC/MCC     | 7,201 |
| 98  | NONBCT INFCT NRV SYS EXC VIRL MNNGTS WCC | 7,191 |
| 844 | OTH MYELOPROLF DIS/PRLY DIFF NEO DX W CC | 7,069 |
| 185 | MAJOR CHEST TRAUMA W/O CC/MCC            | 7,026 |
| 89  | CONCUSSION W CC                          | 7,017 |
| 11  | TRACH FOR FACE,MOUTH & NECK DX W MCC     | 7,003 |
| 497 | LCL EXC&RM INT FX DV EX HP&FMR W/OCC/MCC | 6,832 |
| 94  | BACTERIAL&TB INFECTIONS OF NERV SYS WMCC | 6,807 |
| 518 | BCK/NCK PX EXC SPIN FUS WMCC/DEV/NRV STI | 6,775 |
| 288 | ACUTE & SUBACUTE ENDOCARDITIS W MCC      | 6,747 |
| 601 | NON-MALIGNANT BREAST DISORDERS W/OCC/MCC | 6,742 |
| 534 | FRACTURES OF FEMUR W/O MCC               | 6,724 |
| 102 | HEADACHES W MCC                          | 6,694 |
| 215 | OTHER HEART ASSIST SYSTEM IMPLANT        | 6,674 |
| 453 | COMBINED ANTR/POSTR SPINAL FUSION W MCC  | 6,673 |
| 154 | OTHER EAR, NOSE, MOUTH & THROAT DX W MCC | 6,592 |
| 16  | AUTOLOGOUS BONE MARROW TRNSPLNT W CC/MCC | 6,520 |
| 99  | NONBCT INFCT NRV EX VRL MNNGTS W/OCC/MCC | 6,490 |
| 137 | MOUTH PROCEDURES W CC/MCC                | 6,419 |

|     |                                           |       |
|-----|-------------------------------------------|-------|
| 785 | CESAREAN SECT W STERILIZATION W/O CC/MCC  | 6,413 |
| 382 | COMPLICATED PEPTIC ULCER W/O CC/MCC       | 6,388 |
| 553 | BONE DISEASES & ARTHROPATHIES W MCC       | 6,382 |
| 843 | OTH MYELOPROLF DIS/PRLY DIFF NEO DX WMCC  | 6,371 |
| 420 | HEPATOBIILIARY DIAGNOSTIC PROCEDURES WMCC | 6,361 |
| 245 | AICD GENERATOR PROCEDURES                 | 6,355 |
| 566 | OTH MUSCLSKLTL SYS&CONN TIS DX W/OCC/MCC  | 6,244 |
| 779 | ABORTION W/O D&C                          | 6,238 |
| 157 | DENTAL & ORAL DISEASES W MCC              | 6,233 |
| 726 | BENIGN PROSTATIC HYPERTROPHY W/O MCC      | 6,225 |
| 734 | PELV EVSC,RAD HYSTRCT&RAD VLVCT WCC/MCC   | 5,983 |
| 260 | CARD PACEMKR REV EXC DEV REPLACEMNT WMCC  | 5,973 |
| 746 | VAGINA, CERVIX & VULVA PX W CC/MCC        | 5,963 |
| 770 | ABORT W D&C,ASP CURETTAGE OR HYSTEROTOMY  | 5,960 |
| 514 | HND/WRSTPX, EXC MJR THMB/JNTPX W/OCC/MCC  | 5,944 |
| 12  | TRACH FOR FACE, MOUTH & NECK DX W CC      | 5,929 |
| 296 | CARDIAC ARREST, UNEXPLAINED W MCC         | 5,921 |
| 714 | TRANSURETHRAL PROSTATECTOMY W/O CC/MCC    | 5,901 |
| 598 | MALIGNANT BREAST DISORDERS W CC           | 5,844 |
| 408 | BIL TRCT PX EXC CHLCYST W/W/O CDE WMCC    | 5,837 |
| 52  | SPINAL DISORDERS & INJURIES W CC/MCC      | 5,826 |
| 268 | AORTIC&HRT ASST PX EXC PULSN BLN W MCC    | 5,795 |
| 761 | MNSTRL&OTH FEM REPROD SYS DIS W/OCC/MCC   | 5,759 |
| 255 | UP LMB&TOE AMP FOR CIRC SYS DISORDR WMCC  | 5,749 |
| 754 | MALIGNANCY, FEMALE REPRODUCTIVE SYS WMCC  | 5,742 |
| 829 | MYLPR DS/PRLY DIF NPL W OTH OR PXWCC/MCC  | 5,721 |
| 222 | CRD DFB IMPL W CRD CTH WAMI/HF/SHCK WMCC  | 5,687 |
| 33  | VENTRICULAR SHUNT PROCEDURES W/O CC/MCC   | 5,681 |
| 814 | RETICULOENDOTHELIAL & IMM DISORDERS WMCC  | 5,567 |
| 749 | OTH FEMALE REPRODUCTVE SYS OR PX WCC/MCC  | 5,532 |
| 549 | SEPTIC ARTHRITIS W CC                     | 5,523 |

|     |                                           |       |
|-----|-------------------------------------------|-------|
| 786 | CESAREAN SECT W/O STERILIZATION W MCC     | 5,517 |
| 573 | SKIN GRAFT FOR ULCER/CELLULITIS W MCC     | 5,491 |
| 421 | HEPATOBIILIARY DIAGNOSTIC PROCEDURES W CC | 5,489 |
| 965 | OTHER MULT SIGNIFICANT TRAUMA W/O CC/MCC  | 5,489 |
| 627 | THYROID,PARATHY&THYROGLOSS PX W/O CC/MCC  | 5,480 |
| 96  | BCTERIAL&TB INFECT OF NERV SYS W/OCC/MCC  | 5,469 |
| 456 | SPFS EXC CRV W SP CRV/MLG/INF /9+FS WMCC  | 5,469 |
| 77  | HYPERTENSIVE ENCEPHALOPATHY W MCC         | 5,465 |
| 904 | SKIN GRAFTS FOR INJURIES W CC/MCC         | 5,435 |
| 606 | MINOR SKIN DISORDERS W MCC                | 5,424 |
| 805 | VAG DELIV W/O STERILIZATION/D&C W MCC     | 5,286 |
| 376 | DIGESTIVE MALIGNANCY W/O CC/MCC           | 5,262 |
| 600 | NON-MALIGNANT BREAST DISORDERS W CC/MCC   | 5,251 |
| 541 | OSTEOMYELITIS W/O CC/MCC                  | 5,226 |
| 338 | APPENDECTOMY W COMPLICATED PDX W MCC      | 5,221 |
| 582 | MASTECTOMY FOR MALIGNANCY W CC/MCC        | 5,197 |
| 81  | NONTRAUMATIC STUPOR & COMA W/O MCC        | 5,185 |
| 747 | VAGINA, CERVIX & VULVA PX W/O CC/MCC      | 5,105 |
| 409 | BIL TRCT PX EXC CHLCYST W/W/O CDE WCC     | 5,070 |
| 1   | HEART TRNSPLT/IMPLT HEART AST SYS WMCC    | 5,060 |
| 941 | OR PX W DX OTH CNT W HLTH SRV W/OCC/MCC   | 4,986 |
| 615 | ADRENAL & PITUITARY PROCEDURES W/OCC/MCC  | 4,955 |
| 129 | MJR HEAD&NECK PX WCC/MCC OR MAJOR DEVICE  | 4,939 |
| 622 | SKN GRFT&WND DBRD ENDC,NTRT&MTB DIS WMCC  | 4,920 |
| 626 | THYROID,PARATHYROID&THYROGLOSSAL PX W CC  | 4,886 |
| 939 | OR PX W DX OF OTH CONT W HEALTH SRV WMCC  | 4,843 |
| 577 | SKIN GRAFT EXC FOR ULCER/CELLULITIS W CC  | 4,843 |
| 578 | SKIN GRFT EXC FR ULCR/CELLITIS WO CC/MCC  | 4,840 |
| 231 | CORONARY BYPASS W PTCA W MCC              | 4,832 |
| 748 | FEMALE REPRODUCTVE SYS RECONSTRUCTIVE PX  | 4,791 |
| 803 | OTH OR PX BLOOD&BLOOD FORMNG ORGANS W CC  | 4,776 |

|     |                                          |       |
|-----|------------------------------------------|-------|
| 906 | HAND PROCEDURES FOR INJURIES             | 4,760 |
| 686 | KIDNEY & URINARY TRACT NEOPLASMS W MCC   | 4,756 |
| 827 | MYLPRLF DS/PRLY DIFF NPL W MJ OR PX W CC | 4,731 |
| 653 | MAJOR BLADDER PROCEDURES W MCC           | 4,727 |
| 188 | PLEURAL EFFUSION W/O CC/MCC              | 4,669 |
| 31  | VENTRICULAR SHUNT PROCEDURES W MCC       | 4,631 |
| 727 | INFLAMMATION MALE REPRODUCTIVE SYS WMCC  | 4,571 |
| 876 | O.R. PX W PRINCIPAL DX OF MENTAL ILLNESS | 4,566 |
| 597 | MALIGNANT BREAST DISORDERS W MCC         | 4,543 |
| 976 | HIV W MAJOR RELATED CONDITION W/O CC/MCC | 4,497 |
| 423 | OTHER HEPATOBILIARY/PANCREAS OR PX W MCC | 4,481 |
| 347 | ANAL & STOMAL PROCEDURES W MCC           | 4,447 |
| 738 | UTER&ADNX PX OVARN/ADNXL MALIG W/OCC/MCC | 4,355 |
| 232 | CORONARY BYPASS W PTCA W/O MCC           | 4,288 |
| 821 | LYMPHOMA & LEUKEMIA W MAJOR OR PX W CC   | 4,263 |
| 344 | MINOR SMALL & LARGE BOWEL PX W MCC       | 4,217 |
| 182 | RESPIRATORY NEOPLASMS W/O CC/MCC         | 4,205 |
| 90  | CONCUSSION W/O CC/MCC                    | 4,153 |
| 350 | INGUINAL & FEMORAL HERNIA PX W MCC       | 4,147 |
| 723 | MALIGNANCY, MALE REPRODUCTIVE SYS W CC   | 4,126 |
| 487 | KNEE PX W PDX OF INFECTION W/O CC/MCC    | 4,075 |
| 437 | MALIG OF HEPATOBIL SYS/PANCRS W/OCC/MCC  | 4,071 |
| 584 | BREAST BX, LOC EXCIS&OTH BRST PX WCC/MCC | 4,069 |
| 574 | SKIN GRAFT FOR ULCER/CELLULITIS W CC     | 4,054 |
| 955 | CRANIOTOMY FOR MULT SIGNIFICANT TRAUMA   | 4,008 |
| 655 | MAJOR BLADDER PROCEDURES W/O CC/MCC      | 4,007 |
| 848 | CHEMO W/O ACUTE LEUKEMIA SECDX W/OCC/MCC | 3,967 |
| 58  | MULTIPLE SCLEROSIS&CEREBELLR ATAXIA WMCC | 3,957 |
| 869 | OTH INFECT&PARASITIC DIS DX W/O CC/MCC   | 3,947 |
| 289 | ACUTE & SUBACUTE ENDOCARDITIS W CC       | 3,944 |
| 383 | UNCOMPLICATED PEPTIC ULCER W MCC         | 3,935 |

|     |                                          |       |
|-----|------------------------------------------|-------|
| 820 | LYMPHOMA & LEUKEMIA W MAJOR OR PX W MCC  | 3,922 |
| 619 | O.R. PROCEDURES FOR OBESITY W MCC        | 3,864 |
| 14  | ALLOGENEIC BONE MARROW TRANSPLANT        | 3,863 |
| 341 | APPENDECTOMY W/O COMPLICATED PDX W MCC   | 3,858 |
| 198 | INTERSTITIAL LUNG DISEASE W/O CC/MCC     | 3,824 |
| 510 | SHLDR,ELBW/FRARM PX,EXC MJR JNT PX WMCC  | 3,788 |
| 35  | CAROTID ARTERY STENT PROCEDURE W CC      | 3,781 |
| 498 | LCL EXC&RM INT FX DV OF HIP&FMR WCC/MCC  | 3,757 |
| 691 | URINARY STONES W ESW LITHOTRIpsy WCC/MCC | 3,693 |
| 147 | EAR, NOSE, MOUTH & THROAT MALIGNANCY WCC | 3,690 |
| 666 | PROSTATECTOMY W CC                       | 3,643 |
| 503 | FOOT PROCEDURES W MCC                    | 3,576 |
| 901 | WOUND DEBRIDEMENTS FOR INJURIES W MCC    | 3,573 |
| 485 | KNEE PROCEDURES W PDX OF INFECTION W MCC | 3,539 |
| 695 | KIDNEY&URINARY TRACT SIGNS&SYMPTOMS WMCC | 3,530 |
| 757 | INFECTIONS, FEMALE REPRODUCTIVE SYS WMCC | 3,528 |
| 259 | CARDIAC PACEMAKER DEV REPLACEMNT W/OMCC  | 3,525 |
| 495 | LCL EXC&RMVL INT FIX DV EXC HIP&FMR WMCC | 3,491 |
| 223 | CRD DFB IMP W CRD CTH WAMI/HF/SHK W/OMCC | 3,491 |
| 663 | MINOR BLADDER PROCEDURES W CC            | 3,412 |
| 146 | EAR, NOSE, MOUTH&THROAT MALIGNANCY WMCC  | 3,397 |
| 887 | OTHER MENTAL DISORDER DIAGNOSES          | 3,380 |
| 262 | CRD PCEMKR REV EXC DEV RPLCMNT W/OCC/MCC | 3,375 |
| 928 | FUL THCK BRN W SKN GRFT/INHL INJ WCC/MCC | 3,368 |
| 434 | CIRRHOSIS&ALCOHOLIC HEPATITIS W/OCC/MCC  | 3,365 |
| 370 | MAJOR ESOPHAGEAL DISORDERS W/O CC/MCC    | 3,355 |
| 959 | OTH OR PX MULT SIGNIF TRAUMA W/O CC/MCC  | 3,340 |
| 138 | MOUTH PROCEDURES W/O CC/MCC              | 3,338 |
| 903 | WOUND DEBRIDEMENTS INJURIES W/OCC/MCC    | 3,239 |
| 21  | INTRCRANIAL VASC PX W PDX HEMORRHAGE WCC | 3,211 |
| 825 | LYMPHM&NONACT LEUKM W OTH OR PXW/OCC/MCC | 3,185 |

|     |                                          |       |
|-----|------------------------------------------|-------|
| 802 | OTH OR PX BLOOD&BLOOD FORMNG ORGANS WMCC | 3,178 |
| 506 | MAJOR THUMB OR JOINT PROCEDURES          | 3,135 |
| 595 | MAJOR SKIN DISORDERS W MCC               | 3,095 |
| 476 | AMP FOR MSCLSKLTL SYS&CNN DIS W/OCC/MCC  | 3,072 |
| 735 | PELV EVSC,RAD HYSTRT&RAD VLVCT W/OCC/MCC | 3,066 |
| 804 | OTH OR PX BLOOD&BLOOD FRM ORGN W/OCC/MCC | 3,038 |
| 836 | ACUTE LEUKEMIA W/O MAJOR OR PX W/OCC/MCC | 3,018 |
| 736 | UTER&ADNX PX OVARIAN/ADNEXAL MALIG WMCC  | 3,015 |
| 717 | OTH MALE RPR SYS OR PX EXC MALIG WCC/MCC | 2,970 |
| 780 | FALSE LABOR                              | 2,957 |
| 5   | LIVER TRNSPLNT WMCC OR INTESTNL TRNSPLNT | 2,949 |
| 969 | HIV W EXTENSIVE O.R. PROCEDURE W MCC     | 2,936 |
| 88  | CONCUSSION W MCC                         | 2,906 |
| 833 | OTH ANTEPART DIAG W/O O.R. PX W/O CC/MCC | 2,898 |
| 241 | AM FR CRCSYS DSDR EXC UP LB&TO W/OCC/MCC | 2,883 |
| 121 | ACUTE MAJOR EYE INFECTIONS W CC/MCC      | 2,853 |
| 826 | MYLPRLF DS/PRLY DIFF NPL W MJ OR PX WMCC | 2,804 |
| 832 | OTH ANTEPART DIAG W/O O.R. PX W CC       | 2,776 |
| 150 | EPISTAXIS W MCC                          | 2,763 |
| 828 | MYLPR DS/PRLY DIFF NPL W MJ PX W/OCC/MCC | 2,732 |
| 130 | MAJOR HEAD & NECK PROCEDURES W/O CC/MCC  | 2,660 |
| 799 | SPLENECTOMY W MCC                        | 2,646 |
| 36  | CAROTID ARTERY STENT PROCEDURE W/OCC/MCC | 2,606 |
| 685 | ADMIT FOR RENAL DIALYSIS                 | 2,606 |
| 784 | CESAREAN SECT W STERILIZATION W CC       | 2,574 |
| 800 | SPLENECTOMY W CC                         | 2,558 |
| 729 | OTH MALE REPRODUCTIVE SYSTEM DX W CC/MCC | 2,553 |
| 550 | SEPTIC ARTHRITIS W/O CC/MCC              | 2,546 |
| 124 | OTHER DISORDERS OF THE EYE W MCC         | 2,525 |
| 80  | NONTRAUMATIC STUPOR & COMA W MCC         | 2,523 |
| 67  | NONSPCCVA&PRECRBRL OCCLS W/O INFRCT WMCC | 2,511 |



|     |                                            |       |
|-----|--------------------------------------------|-------|
| 822 | LYMPHOMA&LEUKEMIA W MAJR OR PX W/OCC/MCC   | 2,499 |
| 13  | TRACH FOR FACE, MOUTH&NECK DX W/O CC/MCC   | 2,467 |
| 711 | TESTES PROCEDURES W CC/MCC                 | 2,463 |
| 625 | THYROID, PARATHYROID&THYROGLOSSL PX W MCC  | 2,434 |
| 745 | D&C, CONIZATN, LAP&TUBAL INTRUPT W/OCC/MCC | 2,404 |
| 230 | OTHR CARDIOTHORACIC PROCEDURES W/OCC/MCC   | 2,402 |
| 739 | UTER, ADN X PX NONOVARN/ADNEXAL MALIG WMCC | 2,374 |
| 913 | TRAUMATIC INJURY W MCC                     | 2,344 |
| 855 | INFECT & PARASITIC DIS W OR PX W/O CC/MCC  | 2,343 |
| 332 | RECTAL RESECTION W MCC                     | 2,324 |
| 34  | CAROTID ARTERY STENT PROCEDURE W MCC       | 2,310 |
| 934 | FULL THICK BURN W/O SKN GRFT OR INHL INJ   | 2,262 |
| 113 | ORBITAL PROCEDURES W CC/MCC                | 2,246 |
| 122 | ACUTE MAJOR EYE INFECTIONS W/O CC/MCC      | 2,203 |
| 424 | OTHER HEPATOBILIARY/PANCREAS OR PX W CC    | 2,199 |
| 115 | EXTRAOCULAR PROCEDURES EXCEPT ORBIT        | 2,188 |
| 722 | MALIGNANCY, MALE REPRODUCTIVE SYS W MCC    | 2,180 |
| 79  | HYPERTENSIVE ENCEPHALOPATHY W/O CC/MCC     | 2,134 |
| 265 | AICD LEAD PROCEDURES                       | 2,117 |
| 929 | FUL THCK BRN SKN GRFT/INHL INJ W/OCC/MCC   | 1,982 |
| 507 | MAJOR SHOULDER OR ELBOW JOINT PX WCC/MCC   | 1,977 |
| 537 | SPRN, STRN&DSLCTN HIP, PELVS&THIGH WCC/MCC | 1,968 |
| 410 | BL TRT PX EXC CHLCYT W/W/O CDE W/OCC/MCC   | 1,963 |
| 218 | CD VLV&OTH MJ CD/TH PX WCD CTH W/OCC/MCC   | 1,942 |
| 548 | SEPTIC ARTHRITIS W MCC                     | 1,942 |
| 533 | FRACTURES OF FEMUR W MCC                   | 1,929 |
| 801 | SPLENECTOMY W/O CC/MCC                     | 1,927 |
| 750 | OTH FEMALE REPRODCTV SYS OR PX W/OCC/MCC   | 1,917 |
| 675 | OTHER KIDNEY&URINARY TRACT PX W/O CC/MCC   | 1,862 |
| 412 | CHOLECYSTECTOMY W C.D.E. W CC              | 1,819 |
| 662 | MINOR BLADDER PROCEDURES W MCC             | 1,815 |

|     |                                          |       |
|-----|------------------------------------------|-------|
| 849 | RADIOTHERAPY                             | 1,789 |
| 53  | SPINAL DISORDERS & INJURIES W/O CC/MCC   | 1,768 |
| 284 | ACUTE MYOCARDIAL INFARCTION, EXPIRED WCC | 1,721 |
| 999 | UNGROUPABLE                              | 1,710 |
| 709 | PENIS PROCEDURES W CC/MCC                | 1,668 |
| 845 | OTH MYLPRLF DS/PRLY DFF NEO DX W/OCC/MCC | 1,641 |
| 725 | BENIGN PROSTATIC HYPERTROPHY W MCC       | 1,634 |
| 905 | SKIN GRAFTS FOR INJURIES W/O CC/MCC      | 1,620 |
| 258 | CARDIAC PACEMAKER DEVICE REPLACEMNT WMCC | 1,546 |
| 624 | SKNGFT&WNDDBD EDC,NTRT&MTB DIS W/OCC/MCC | 1,536 |
| 665 | PROSTATECTOMY W MCC                      | 1,512 |
| 413 | CHOLECYSTECTOMY W C.D.E. W/O CC/MCC      | 1,502 |
| 664 | MINOR BLADDER PROCEDURES W/O CC/MCC      | 1,479 |
| 411 | CHOLECYSTECTOMY W C.D.E. W MCC           | 1,460 |
| 135 | SINUS & MASTOID PROCEDURES W CC/MCC      | 1,438 |
| 461 | BILAT/MULT MJR JOINT PX OF LWR EXT WMCC  | 1,378 |
| 575 | SKIN GRAFT FR ULCER/CELLULITIS WO CC/MCC | 1,374 |
| 630 | OTH ENDOCRN,NUTRI&METAB OR PX W/O CC/MCC | 1,372 |
| 798 | VAGINAL DELIVERY W STERILIZATN/D&C W/O C | 1,371 |
| 263 | VEIN LIGATION & STRIPPING                | 1,366 |
| 688 | KIDNEY&URINARY TRACT NEOPLASMS W/OCC/MCC | 1,346 |
| 715 | OTH MALE RPR SYS OR PX FOR MALIG WCC/MCC | 1,336 |
| 671 | URETHRAL PROCEDURES W CC/MCC             | 1,328 |
| 594 | SKIN ULCERS W/O CC/MCC                   | 1,327 |
| 667 | PROSTATECTOMY W/O CC/MCC                 | 1,288 |
| 576 | SKIN GRAFT EXC FR ULCER/CELLULITIS W MCC | 1,261 |
| 710 | PENIS PROCEDURES W/O CC/MCC              | 1,238 |
| 6   | LIVER TRANSPLANT W/O MCC                 | 1,219 |
| 697 | URETHRAL STRICTURE                       | 1,206 |
| 712 | TESTES PROCEDURES W/O CC/MCC             | 1,192 |
| 756 | MALIG, FEMALE REPRODUCTIVE SYS W/OCC/MCC | 1,186 |

|     |                                          |       |
|-----|------------------------------------------|-------|
| 294 | DEEP VEIN THROMBOPHLEBITIS W CC/MCC      | 1,167 |
| 116 | INTRAOCULAR PROCEDURES W CC/MCC          | 1,160 |
| 985 | PROSTATIC OR PX UNRELATED PRINCP DX W CC | 1,159 |
| 148 | ENT & MOUTH MALIGNANCY W/O CC/MCC        | 1,146 |
| 830 | MYLPR DS/PRLY DIF NPL W OTH PX W/OCC/MCC | 1,131 |
| 499 | LCL EXC&RM INT FX DV OF HP&FMR W/OCC/MCC | 1,120 |
| 22  | INTRCRAN VASC PX WPDH HEMORRHG W/OCC/MCC | 1,102 |
| 422 | HEPATOBIILIARY DIAGNOSTIC PX W/O CC/MCC  | 1,094 |
| 831 | OTH ANTEPART DIAG W/O O.R. PX W MCC      | 1,075 |
| 508 | MAJOR SHOULDER OR ELBOW JNT PX W/OCC/MCC | 1,024 |
| 114 | ORBITAL PROCEDURES W/O CC/MCC            | 1,015 |
| 538 | SPRN,STRN&DSLCTN HIP,PLVS&THGH W/OCC/MCC | 993   |
| 718 | OTH MALE RPR SY OR PX EXC MALG W/OCC/MCC | 918   |
| 927 | EXT/FULL THCK BRNS W MV>96HRS W SKN GRFT | 891   |
| 984 | PROSTATIC OR PX UNRELATED P DX WMCC(V34) | 824   |
| 783 | CESAREAN SECT W STERILIZATION W MCC      | 821   |
| 17  | AUTOLOGOUS BONE MAROW TRNSPLNT WO CC/MCC | 768   |
| 139 | SALIVARY GLAND PROCEDURES                | 752   |
| 290 | ACUTE & SUBACUTE ENDOCARDITIS W/O CC/MCC | 740   |
| 730 | OTH MALE REPRODUCTVE SYSTEM DX W/OCC/MCC | 740   |
| 599 | MALIGNANT BREAST DISORDERS W/O CC/MCC    | 716   |
| 257 | UP LMB&TO AMP FR CRC SYS DSRDR W/OCC/MCC | 639   |
| 618 | AMP LWRLMB ENDCR,NTRT,&MTB DIS W/OCC/MCC | 628   |
| 2   | HEART TRNSPLT/IMPLT HEART AST SYS W/OMCC | 591   |
| 998 | PRINCIPAL DX INVALID AS DISCHARGE DX     | 549   |
| 692 | URINARY STONES W ESW LITHOTRPY W/OCC/MCC | 541   |
| 117 | INTRAOCULAR PROCEDURES W/O CC/MCC        | 519   |
| 672 | URETHRAL PROCEDURES W/O CC/MCC           | 519   |
| 136 | SINUS & MASTOID PROCEDURES W/O CC/MCC    | 457   |
| 8   | SIMULTANEOUS PANCREAS/KIDNEY TRANSPLANT  | 456   |
| 724 | MALIGNANCY, MALE REPRODCTV SYS W/OCC/MCC | 450   |

|     |                                          |     |
|-----|------------------------------------------|-----|
| 797 | VAGINAL DELIVERY W STERILIZATN/D&C W CC  | 441 |
| 509 | ARTHROSCOPY                              | 429 |
| 425 | OTH HEPBIL/PANCREAS O.R. PX W/O CC/MCC   | 391 |
| 7   | LUNG TRANSPLANT                          | 379 |
| 285 | ACUTE MI, EXPIRED W/O CC/MCC             | 366 |
| 986 | PROSTATIC OR PX UNRELAT PRN DX W/OCC/MCC | 340 |
| 297 | CARDIAC ARREST, UNEXPLAINED W CC         | 332 |
| 970 | HIV W EXTENSIVE O.R. PROCEDURE W/O MCC   | 332 |
| 818 | OTH ANTEPART DIAG W O.R. PX W CC         | 311 |
| 716 | OTH MALE RPR SYS OR PX MALIG W/OCC/MCC   | 280 |
| 817 | OTH ANTEPART DIAG W O.R. PX W MCC        | 238 |
| 933 | EXT/FL THCK BRNS W MV>96HRS W/O SKN GRFT | 234 |
| 819 | OTH ANTEPART DIAG W O.R. PX W/O CC/MCC   | 216 |
| 295 | DEEP VEIN THROMBOPHLEBITIS W/O CC/MCC    | 195 |
| 796 | VAGINAL DELIVERY W STERILIZATN/D&C W MCC | 132 |
| 298 | CARDIAC ARREST, UNEXPLAINED W/O CC/MCC   | 106 |
| 10  | PANCREAS TRANSPLANT                      | 79  |

**Supplementary Table 7: GRU model hyperparameters**

| Hyperparameter          | Value        |
|-------------------------|--------------|
| Sequence Length         | 100          |
| Embedding Shape         | 8 dimensions |
| GRU hidden size         | 128/64/32    |
| GRU hidden dropout      | 0.1/0.1/0.1  |
| Dense hidden size       | 32/16        |
| Dense Hidden dropout    | 0.1          |
| Early Stopping Patience | 100          |
